# Supplementary material for: Characteristics of the Early Immune Response Following Transplantation of Mouse ES Cell Derived Insulin-Producing Cell Clusters
Source: PubMed Central journal article supplement (PMC2881030; doi:10.1371/journal.pone.0010965), 2010-06-04
Supplement: pone.0010965.s001.pdf [file pone.0010965.s001.pdf]

**Flood EB culture plate with medium**

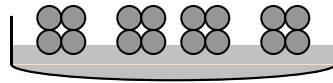

**ES cell medium**

*3 days*

**Transfer EBs to gelatin-coated culture dishes**

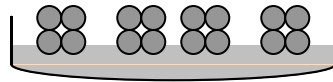

**ES cell medium**

*7 days*

**Transfer clusters to PLO + laminin-coated culture dishes**

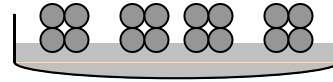

**N2 medium + B27, laminin,  
insulin & nicotinamide**

*19 days*

**Begin to harvest cells**

***Supplemental Figure 1***
