# Supplementary material for: Characteristics of the Early Immune Response Following Transplantation of Mouse ES Cell Derived Insulin-Producing Cell Clusters
Source: PubMed Central journal article supplement (PMC2881030; doi:10.1371/journal.pone.0010965), 2010-06-04
Supplement: pone.0010965.s003.pdf [file pone.0010965.s003.pdf]

A

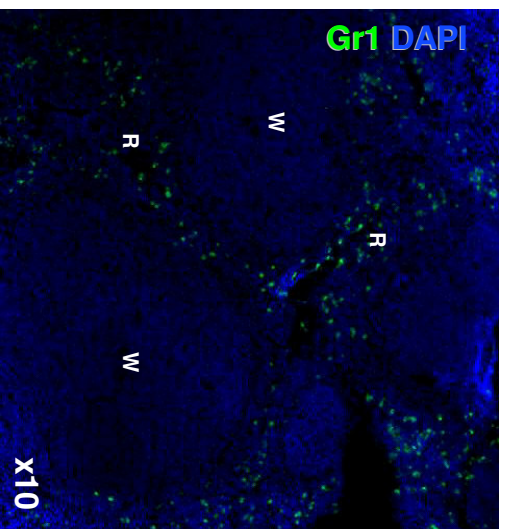

B

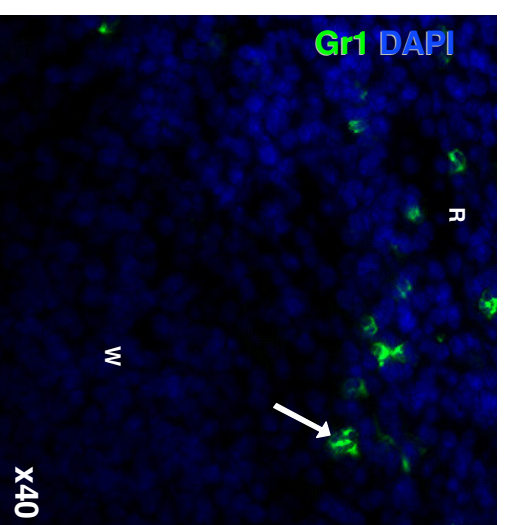

C

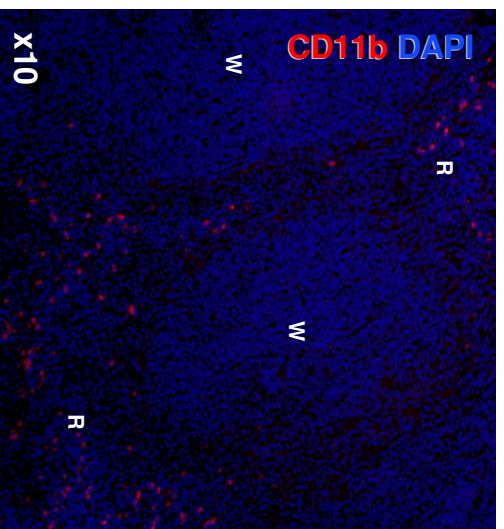

D

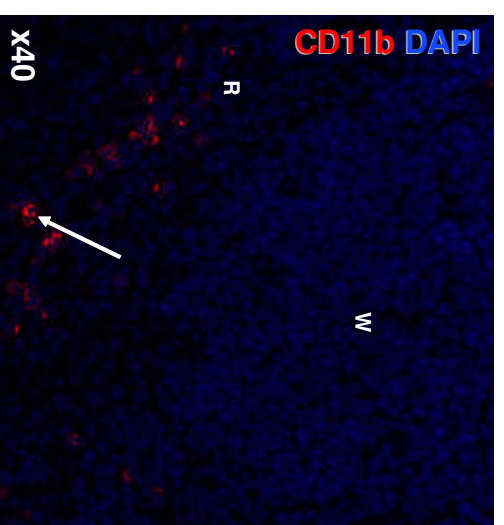

**Supplemental Figure 3**
